# Supplementary figures and images for: Isolation and identification of bioactive peptides from Xuanwei ham that rescue oxidative stress damage induced by alcohol in HHL-5 hepatocytes
Source: Royal Society of Chemistry journal article supplement (doi:10.1039/d0fo02329a), 2020-01-01

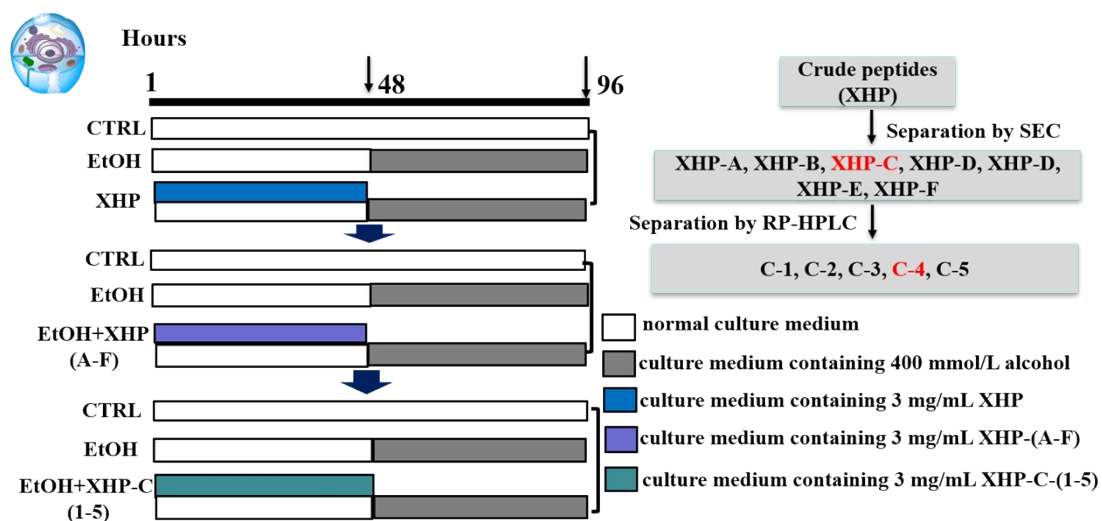

Cell culture and treatments scheme

Supplement: d0fo02329a1.pdf [file d0fo02329a1.pdf]
